# Supplementary material for: High early life mortality in free-ranging dogs is largely influenced by humans
Source: PubMed Central journal article supplement (PMC4726281; doi:10.1038/srep19641), 2016-01-25
Supplement: srep19641-s1.pdf [file srep19641-s1.pdf]

1 **High early life mortality in free-ranging dogs is largely influenced by humans**

2

3 Manabi Paul<sup>1</sup>, Sreejani Sen Majumder<sup>1</sup>, Shubhra Sau<sup>1</sup>, Anjan K. Nandi<sup>2</sup> and Anindita Bhadra<sup>1\*</sup>

4

5 **Supplementary Information**

6

7 <sup>1</sup> Department of Biological Sciences,

8 Indian Institute of Science Education and Research Kolkata, India

9

10 <sup>2</sup> Department of Physical Sciences,

11 Indian Institute of Science Education and Research Kolkata, India

12

13 **\* Address for Correspondence:**

14 Behaviour and Ecology Lab, Department of Biological Sciences,

15 Indian Institute of Science Education and Research Kolkata

16 Mohanpur Campus, Mohanpur,

17 PIN 741246, West Bengal, INDIA

18 *tel.* 91-33-25873119 *fax* +91-33-

19 25873020 *e-mail:*

20 [abhadra@iiserkol.ac.in](mailto:abhadra@iiserkol.ac.in)

21

22

23 **Supplementary Information 1**

24

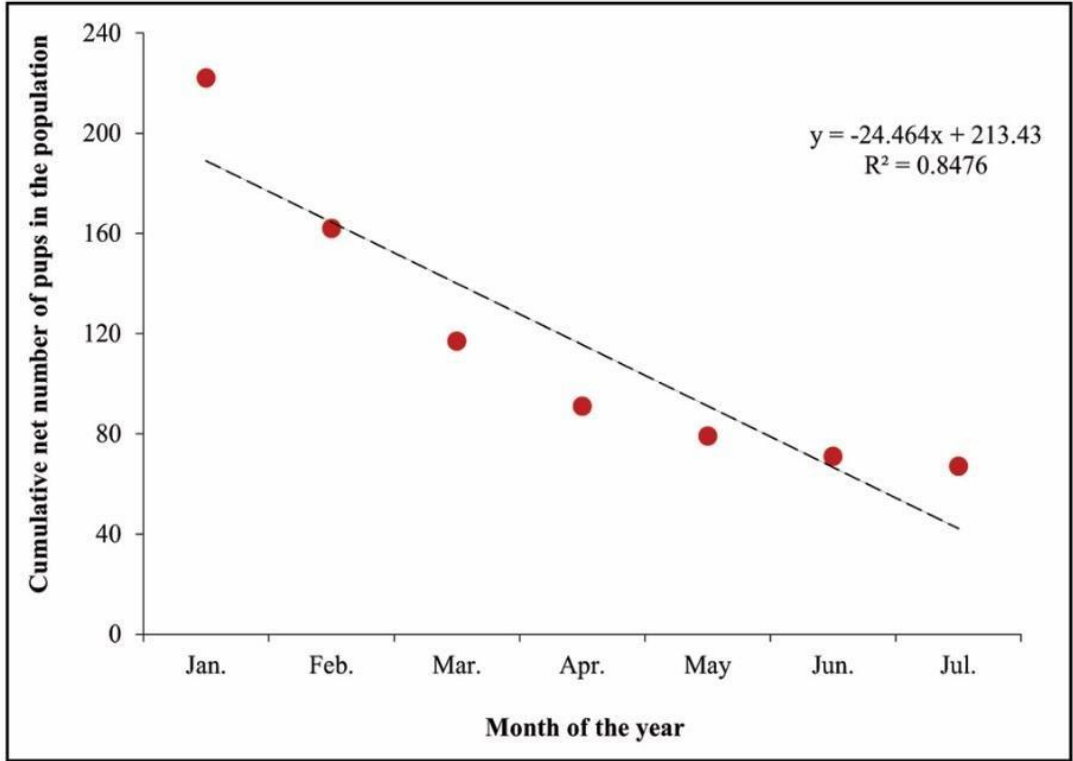

25

26 **Supplementary Figure 1:** Line graph showing the significant decrease in the cumulative net

27 number of pups in the population (Linear regression:  $R^2 = 0.848$ , std.  $\beta = -0.921$ ,  $P = 0.003$ ) from

28 the month of January.

29

30

31

32

33

34

35 **Supplementary Information 2**

36

37 **Details of the Cox proportional hazard (PH) model**

38 The used variables are:

39 Litter size- **Ls**

40 Sex of the individual pup- **fsx** (Male- **M**, Female- **F**)

41 Habitat types- **fhb** (Urban- **UR**, Suburban- **SU**)

42 Year of data collection- **fyr**

43 Litter identity- **flt**

44

45 We started with the full model:

46 **Model 1 <- coxme(Surv(Age,Srv)~Ls\*fsx\*fhb+(1|fyr/flt))**

47

48 **Fixed coefficients**

|               | <b>coef</b> | <b>exp(coef)</b> | <b>se(coef)</b> | <b>z</b> | <b>p</b>      |
|---------------|-------------|------------------|-----------------|----------|---------------|
| Ls            | 0.01570455  | 1.0158285        | 0.07715722      | 0.20     | 0.8400        |
| fsxM          | 0.84094228  | 2.3185507        | 0.48797975      | 1.72     | 0.0850        |
| fhbUR         | -1.43324636 | 0.2385333        | 0.53548240      | -2.68    | <b>0.0074</b> |
| Ls:fsxM       | -0.09957380 | 0.9052231        | 0.09994753      | -1.00    | 0.3200        |
| Ls:fhbUR      | 0.09531852  | 1.1000092        | 0.09495200      | 1.00     | 0.3200        |
| fsxM:fhbUR    | 0.30250525  | 1.3532448        | 0.65003978      | 0.47     | 0.6400        |
| Ls:fsxM:fhbUR | 0.01859136  | 1.0187653        | 0.11831918      | 0.16     | 0.8800        |

49

50 **Random effects**

| 51 | <b>Group</b> | <b>Variable</b> | <b>Std Dev</b> | <b>Variance</b> |
|----|--------------|-----------------|----------------|-----------------|
| 52 |              |                 |                |                 |
| 53 | fyr/flt      | (Intercept)     | 0.29959233     | 0.08975556      |

54 fyr (Intercept) 0.27205404 0.07401340

55

56 AIC- 2570.593 BIC- 2656.297

57 Since the three-way interaction is not significant, we have dropped the term and run the model  
58 again.

59 -----

60

61 **Model 2: Surv(Age, Srv) ~ Ls \* fsx + Ls \* fhb + fsx \* fhb + (1 | fyr/flt)**

62

63 **Fixed coefficients**

64

|            | <b>coef</b>  | <b>exp(coef)</b> | <b>se(coef)</b> | <b>z</b> | <b>p</b>      |
|------------|--------------|------------------|-----------------|----------|---------------|
| Ls         | 0.008998816  | 1.0090394        | 0.06416382      | 0.14     | 0.8900        |
| fsxM       | 0.779890845  | 2.1812342        | 0.29713058      | 2.62     | <b>0.0087</b> |
| fhbUR      | -1.483858605 | 0.2267610        | 0.42607622      | -3.48    | <b>0.0005</b> |
| Ls:fsxM    | -0.086267492 | 0.9173488        | 0.05319201      | -1.62    | 0.1000        |
| Ls:fhbUR   | 0.104993312  | 1.1107032        | 0.07196555      | 1.46     | 0.1400        |
| fsxM:fhbUR | 0.394229189  | 1.4832405        | 0.28747741      | 1.37     | 0.1700        |

65 **Random effects**

66

| 67 | <b>Group</b> | <b>Variable</b> | <b>Std Dev</b> | <b>Variance</b> |
|----|--------------|-----------------|----------------|-----------------|
| 68 |              |                 |                |                 |
| 69 | fyr/flt      | (Intercept)     | 0.29896284     | 0.08937878      |
| 70 | (Intercept)  |                 | 0.27207534     | 0.07402499      |

71

72 We have compared our recent model with the previous one and the result represents no  
73 difference between these two models. Model comparisons justify the dropping of the three-way  
74 term.

75 **anova(Model 1,Model 2)**

76 Analysis of Deviance Table

77

78 **Cox model:** response is Surv(Age, Srv)

79 Model 1: ~Ls \* fsx \* fhb + (1 | fyr/flt)

80 Model 2: ~Ls \* fsx + Ls \* fhb + fsx \* fhb + (1 | fyr/flt)

81

| 82 | <b>loglik</b> | <b>Chisq</b> | <b>Df</b> | <b>P(&gt; Chi)</b> |
|----|---------------|--------------|-----------|--------------------|
| 83 |               |              |           |                    |
| 84 | 1 -1282.2     |              |           |                    |
| 85 | 2 -1282.2     | 0.0255       | 1         | <b>0.8731</b>      |

86

| 87 |                | <b>AIC</b> | <b>BIC</b> |
|----|----------------|------------|------------|
| 88 |                |            |            |
| 89 | <b>Model 1</b> | 2570.593   | 2656.297   |
| 90 | <b>Model 2</b> | 2568.74    | 2650.93    |

91

92 Since the last three two-way interactions (Ls:fsxM, Ls:fhbUR, fsxM:fhbUR) have no significant  
 93 effect on the survival of the pups, we have dropped those terms one by one and run the model  
 94 (please see Model 3 to Model 7) and have compared them with Model 2.

95 -----

96

97 **Model 3: Surv(Age, Srv) ~ Ls \* fsx + fsx \* fhb + (1 | fyr/flt)**

98

99 **Fixed coefficients**

100

|            | <b>coef</b> | <b>exp(coef)</b> | <b>se(coef)</b> | <b>z</b> | <b>p</b>       |
|------------|-------------|------------------|-----------------|----------|----------------|
| Ls         | 0.07372565  | 1.0765114        | 0.04698772      | 1.57     | 1.2e-01        |
| fsxM       | 0.78701974  | 2.1968395        | 0.30807567      | 2.55     | <b>1.1e-02</b> |
| fhbUR      | -0.96819539 | 0.3797678        | 0.23222708      | -4.17    | <b>3.1e-05</b> |
| Ls:fsxM    | -0.08268252 | 0.9206434        | 0.05453325      | -1.52    | 1.3e-01        |
| fsxM:fhbUR | 0.34832693  | 1.4166953        | 0.28312017      | 1.23     | 2.2e-01        |

**Random effects**

| <b>Group</b> | <b>Variable</b> | <b>Std Dev</b> | <b>Variance</b> |
|--------------|-----------------|----------------|-----------------|
|--------------|-----------------|----------------|-----------------|

101 fyr/flt (Intercept) 0.31669814 0.10029771 fyr

102 (Intercept) 0.26152076 0.06839311

103

104 anova (Model 2, **Model 3**)

105 Model 2:  $\sim Ls * fsx + Ls * fhb + fsx * fhb + (1 | fyr/flt)$

106 Model 3:  $\sim Ls * fsx + fsx * fhb + (1 | fyr/flt)$

107

108 **loglik** **Chisq** **Df** **P(>|Chi|)**

109

110 1 -1282.2

111 2 -1283.2 2.0782 1 **0.1494**

112

113 **AIC** **BIC**

114

115 **Model 2** 2568.74 2650.93

116 **Model 3** 2569.095 2653.573

117 -----

118

119 **Model 4: Surv(Age, Srv) ~ Ls \* fhb + fsx \* fhb + (1 | fyr/flt)**

120

121 **Fixed coefficients**

122

|            | <b>coef</b> | <b>exp(coef)</b> | <b>se(coef)</b> | <b>z</b> | <b>p</b>       |
|------------|-------------|------------------|-----------------|----------|----------------|
| Ls         | -0.03471206 | 0.9658835        | 0.05779131      | -0.60    | 0.55000        |
| fhbUR      | -1.37040645 | 0.2540037        | 0.40691242      | -3.37    | <b>0.00076</b> |
| fsxM       | 0.38180764  | 1.4649303        | 0.16814933      | 2.27     | <b>0.02300</b> |
| Ls:fhbUR   | 0.09520048  | 1.0998793        | 0.07106405      | 1.34     | 0.18000        |
| fhbUR:fsxM | 0.29710307  | 1.3459540        | 0.27756514      | 1.07     | 0.28000        |

123

124 **Random effects**

125

126 **Group Variable Std Dev Variance**

127

---

128 fyr/flt (Intercept) 0.29156310 0.08500904 fyr (Intercept) 0.26369259  
 129 0.06953378

130

131 anova(Model 2, **Model 4**)

132 Model 2: ~Ls \* fsx + Ls \* fhb + fsx \* fhb + (1 | fyr/flt)

133 Model 4: ~Ls \* fhb + fsx \* fhb + (1 | fyr/flt)

134

135 **loglik Chisq Df P(>|Chi)**

136

137 1 -1282.2

138 2 -1283.5 2.6155 1 **0.1058**

139

140 **AIC BIC**

141

---

142 **Model 2** 2568.74 2650.93

143 **Model 4** 2569.801 2646.503

144 -----

145

146

147 **Model 5: Surv(Age, Srv) ~ Ls \* fsx + Ls \* fhb + (1 | fyr/flt)**

148

---



149 **Fixed coefficients**

|          | <b>coef</b>  | <b>exp(coef)</b> | <b>se(coef)</b> | <b>z</b> | <b>p</b>      |
|----------|--------------|------------------|-----------------|----------|---------------|
| Ls       | 0.004841435  | 1.0048532        | 0.06526170      | 0.07     | 0.9400        |
| fsxM     | 0.850131724  | 2.3399551        | 0.29287713      | 2.90     | <b>0.0037</b> |
| fhbUR    | -1.223097327 | 0.2943172        | 0.37821047      | -3.23    | <b>0.0012</b> |
| Ls:fsxM  | -0.070718539 | 0.9317241        | 0.05184056      | -1.36    | 0.1700        |
| Ls:fhbUR | 0.095917285  | 1.1006680        | 0.07254510      | 1.32     | 0.1900        |

**Random effects**

| <b>Group</b> | <b>Variable</b> | <b>Std Dev</b> | <b>Variance</b> |
|--------------|-----------------|----------------|-----------------|
| fyr/flt      | (Intercept)     | 0.31310339     | 0.09803373      |
|              | (Intercept)     | 0.26550228     | 0.07049146      |

anova (Model 2, **Model 5**)

Model 2: ~Ls \* fsx + Ls \* fhb + fsx \* fhb + (1 | fyr/flt)

Model 5: ~Ls \* fsx + Ls \* fhb + (1 | fyr/flt)

| <b>loglik</b> | <b>Chisq</b> | <b>Df</b> | <b>P(&gt; Chi )</b> |
|---------------|--------------|-----------|---------------------|
|---------------|--------------|-----------|---------------------|

1 -1282.2  
 2 -1283.1 1.9027 1 **0.1678**

**AIC BIC**

150 **Model 2** 2568.74 2650.93 **Model 5** 2568.349 2650.918

151 -----

152

153 **Model 6: Surv(Age, Srv) ~ Ls + fhb \* fsx + (1 | fyr/flt)**

154

155 **Fixed coefficients**

|            | <b>coef</b> | <b>exp(coef)</b> | <b>se(coef)</b> | <b>z</b> | <b>p</b>       |
|------------|-------------|------------------|-----------------|----------|----------------|
| Ls         | 0.02617522  | 1.0265208        | 0.03558231      | 0.74     | 4.6e-01        |
| fhbUR      | -0.91849163 | 0.3991206        | 0.22668846      | -4.05    | <b>5.1e-05</b> |
| fsxM       | 0.39377100  | 1.4825610        | 0.16821560      | 2.34     | <b>1.9e-02</b> |
| fhbUR:fsxM | 0.28426561  | 1.3287858        | 0.27811186      | 1.02     | 3.1e-01        |

**Random effects**

**Group Variable Std Dev Variance**

156 fyr/flt (Intercept) 0.30561067 0.09339788 fyr

157 (Intercept) 0.25462376 0.06483326

158

159 anova (Model 2,**Model 6**)

160 Model 2: ~Ls \* fsx + Ls \* fhb + fsx \* fhb + (1 | fyr/flt)

161 Model 6: ~Ls + fhb \* fsx + (1 | fyr/flt)

162

163 **loglik** **Chisq** **Df** **P(>|Chi|)**

---

164 1 -1282.2

165 2 -1284.4 4.3705 2 **0.1124**

167

168 **AIC** **BIC**

---

169 **Model 2** 2568.74 2650.93

170 **Model 6** 2569.932 2647.916

---

173

174 **Model 7: Surv (Age, Srv) ~ Ls + fhb + fsx + (1 | fyr/flt)**

175

176 **Fixed coefficients**

177

---

178 **coef** **exp(coef)** **se(coef)** **z** **p**

---

181 Ls 0.02612448 1.0264687 0.03600451 0.73 4.7e-01 fhbUR -0.76601451 0.4648621

182 0.16541716 -4.63 **3.6e-06** fsxM 0.50049802 1.6495426 0.13346754 3.75 **1.8e-04**

---

184

185 **Random effects**

186

187 **Group Variable Std Dev Variance**

188

---

189 fyr/flt (Intercept) 0.31801808 0.10113550 fyr (Intercept) 0.24977424  
 190 0.06238717

191

192 anova(Model 2, **Model 7**)

193 Model 2: ~Ls \* fsx + Ls \* fhb + fsx \* fhb + (1 | fyr/flt)

194 Model 7: ~Ls + fhb + fsx + (1 | fyr/flt)

195

196 **loglik Chisq Df P(>|Chi)**

197

---

198 1 -1282.2  
 198 2 -1284.9 5.4174 3 **0.1437**

**AIC BIC**

199

---

200 **Model 2** 2568.74 2650.93

201 **Model 7** 2568.76 2646.738

202 -----

203

204

205

206 **Supplementary Information 3**

207

208 **Cumulative Incidence Curve for Habitats**

209 Survived- **0**

210 Natural death-**1**

211 Taken by human- **2**

212 Murdered by human- **3**

213 Death in road accident- **4**

214 No information about their death but disappeared from the population- **5**

215

216 **The frequency distribution for the different habitats is as follows:**

217

218 Category            **0**    **1**    **2**    **3**    **4**    **5**

219 -----

220 Suburban (SU)    19    **70**    27    **16**    18    64

221 Urban (UR)        50    24    20    0    13    43

222 \_\_\_\_\_

223 Disappearance due to natural causes and death by human are significantly higher in suburban  
224 population in compare to the urban population.

225

226 **Category**            **stat**                    **p**                    **df**

227 \_\_\_\_\_

228

|     |   |             |                     |   |
|-----|---|-------------|---------------------|---|
| 229 | 1 | 11.10519852 | <b>0.0008608607</b> | 1 |
| 230 | 2 | 0.01882155  | 0.8908792995        | 1 |
| 231 | 3 | 11.67067374 | <b>0.0006349301</b> | 1 |
| 232 | 4 | 0.02139737  | 0.8837016160        | 1 |
| 233 | 5 | 0.18833068  | 0.6643096252        | 1 |

234 

---

235

236

237

238

239

240

241

242

243

244

245

246

247

248

249

250 **Supplementary 4**

251

252 **Simulation model for mortality in dog populations**

253

254 **Variables used:**

255 Total number of male pups survived- **m**

256 Total number of female pups survived- **f**

257 Number of male pups died per 100 pups- **mdp**

258 Number of female pups died per 100 pups- **fdp**

259

260 **The details of the program** mortality

261 <- function(m,f,mdp,tdp){

262

263 # Total number of male and female at the beginning

264 m\_init <- m f\_init <- f

265

266 # Male death percentage

267 MDP <- mdp/100

268

269 # Total death percentage

270 TDP <- tdp/100

271

```

272 # Number of male alive (after removing dead males)
273 m_dead <- m_init*MDP  m_alive <- m_init -
274 m_dead
275
276 # Total number of male and females alive
277 tot_alive <- m_alive + f_init
278
279 # Total number of individual dies
280 tot_death <- tot_alive*TDP
281
282 # Creating blank lists for putting 1000 iteration values
283 m_res <- numeric(1000)  f_res <- numeric(1000)
284
285 # Iterating mortality in one age class 1000 times
286 for (j in 1:1000){  list <- c("M", "F")  death
287 <- numeric(tot_death)  for (i in 1:tot_death){
288 death[i] <- sample(list, 1)
289   }
290   m_res[j] = m_alive - length(subset(death, death == "M")) # Dead males
291   f_res[j] = f_init - length(subset(death, death == "F")) #Dead females
292 }
293

```



```
294 # Average of 1000 iterations of mortality in one age class
295 m_res_avg <- mean(m_res) # Males f_res_avg <-
296 mean(f_res) # Females
297
298 # Final result result <- c("Males Alive=", m_res_avg, "Females
299 Alive=", f_res_avg) return(result)
300 }
```

## Supplementary 5

Raw data showing details of the 95 litters used for the analysis of pup survival up to 7th month of age.

| Year of data collection | Mother's identity | Litter size | Pup's identity | Sex | Age in days | Survived till 7 month of pup age* | Cause of death       | Habitat type |
|-------------------------|-------------------|-------------|----------------|-----|-------------|-----------------------------------|----------------------|--------------|
| 2010-2011               | M1                | 7           | P1             | M   | 136         | 1                                 | Being taken by human | Suburban     |
| 2010-2011               | M1                | 7           | P2             | M   | 136         | 1                                 | Being taken by human | Suburban     |
| 2010-2011               | M1                | 7           | P3             | F   | 136         | 1                                 | Being taken by human | Suburban     |
| 2010-2011               | M1                | 7           | P4             | F   | 136         | 1                                 | Being taken by human | Suburban     |
| 2010-2011               | M1                | 7           | P5             | F   | 136         | 1                                 | Being taken by human | Suburban     |
| 2010-2011               | M1                | 7           | P6             | F   | 136         | 1                                 | Being taken by human | Suburban     |
| 2010-2011               | M1                | 7           | P7             | F   | 136         | 1                                 | Being taken by human | Suburban     |
| 2010-2011               | M2                | 4           | P8             | F   | 211         | 0                                 |                      | Suburban     |
| 2010-2011               | M2                | 4           | P9             | M   | 211         | 0                                 |                      | Suburban     |
| 2010-2011               | M2                | 4           | P10            | F   | 149         | 1                                 | Disease              | Suburban     |
| 2010-2011               | M2                | 4           | P11            | M   | 126         | 1                                 | Inter group fight    | Suburban     |
| 2010-2011               | M3                | 8           | P12            | M   | 128         | 1                                 | Missing              | Suburban     |
| 2010-2011               | M3                | 8           | P13            | M   | 128         | 1                                 | Missing              | Suburban     |
| 2010-2011               | M3                | 8           | P14            | F   | 128         | 1                                 | Missing              | Suburban     |
| 2010-2011               | M3                | 8           | P15            | F   | 128         | 1                                 | Missing              | Suburban     |
| 2010-2011               | M3                | 8           | P16            | F   | 149         | 1                                 | Missing              | Suburban     |
| 2010-2011               | M3                | 8           | P17            | M   | 188         | 1                                 | Missing              | Suburban     |
| 2010-2011               | M3                | 8           | P18            | M   | 182         | 1                                 | Missing              | Suburban     |

|           |     |   |     |   |     |   |                   |          |
|-----------|-----|---|-----|---|-----|---|-------------------|----------|
| 2010-2011 | M3  | 8 | P19 | F | 169 | 1 | Road accident     | Suburban |
| 2010-2011 | M4  | 2 | P20 | M | 129 | 1 | Disease           | Suburban |
| 2010-2011 | M4  | 2 | P21 | F | 211 | 0 |                   | Suburban |
| 2010-2011 | M5  | 4 | P22 | M | 92  | 1 | Poison            | Suburban |
| 2010-2011 | M5  | 4 | P23 | F | 92  | 1 | Poison            | Suburban |
| 2010-2011 | M5  | 4 | P24 | F | 92  | 1 | Poison            | Suburban |
| 2010-2011 | M5  | 4 | P25 | F | 211 | 0 |                   | Suburban |
| 2010-2011 | M6  | 1 | P26 | M | 121 | 1 | Disease           | Suburban |
| 2010-2011 | M7  | 4 | P27 | U | 57  | 1 | Poison            | Suburban |
| 2010-2011 | M7  | 4 | P28 | U | 57  | 1 | Poison            | Suburban |
| 2010-2011 | M7  | 4 | P29 | U | 57  | 1 | Poison            | Suburban |
| 2010-2011 | M7  | 4 | P30 | U | 57  | 1 | Poison            | Suburban |
| 2010-2011 | M8  | 3 | P31 | M | 67  | 1 | Disease           | Suburban |
| 2010-2011 | M8  | 3 | P32 | F | 67  | 1 | Disease           | Suburban |
| 2010-2011 | M8  | 3 | P33 | F | 67  | 1 | Disease           | Suburban |
| 2010-2011 | M9  | 4 | P34 | U | 50  | 1 | Poison            | Suburban |
| 2010-2011 | M9  | 4 | P35 | U | 50  | 1 | Poison            | Suburban |
| 2010-2011 | M9  | 4 | P36 | U | 50  | 1 | Poison            | Suburban |
| 2010-2011 | M9  | 4 | P37 | U | 50  | 1 | Poison            | Suburban |
| 2010-2011 | M10 | 5 | P38 | M | 79  | 1 | Missing           | Suburban |
| 2010-2011 | M10 | 5 | P39 | F | 96  | 1 | Road accident     | Suburban |
| 2010-2011 | M10 | 5 | P40 | F | 127 | 1 | Road accident     | Suburban |
| 2010-2011 | M10 | 5 | P41 | F | 122 | 1 | Inter group fight | Suburban |
| 2010-2011 | M10 | 5 | P42 | F | 160 | 1 | Missing           | Suburban |

|           |     |   |     |   |     |   |         |          |
|-----------|-----|---|-----|---|-----|---|---------|----------|
| 2010-2011 | M11 | 4 | P43 | M | 92  | 1 | Missing | Suburban |
| 2010-2011 | M11 | 4 | P44 | M | 92  | 1 | Missing | Suburban |
| 2010-2011 | M11 | 4 | P45 | M | 92  | 1 | Missing | Suburban |
| 2010-2011 | M11 | 4 | P46 | F | 92  | 1 | Missing | Suburban |
| 2010-2011 | M12 | 3 | P47 | M | 181 | 1 | Missing | Suburban |
| 2010-2011 | M12 | 3 | P48 | F | 82  | 1 | Missing | Suburban |
| 2010-2011 | M12 | 3 | P49 | F | 82  | 1 | Missing | Suburban |

|           |     |    |     |   |     |   |                      |          |
|-----------|-----|----|-----|---|-----|---|----------------------|----------|
| 2010-2011 | M13 | 4  | P50 | F | 29  | 1 | Missing              | Suburban |
| 2010-2011 | M13 | 4  | P51 | F | 29  | 1 | Missing              | Suburban |
| 2010-2011 | M13 | 4  | P52 | F | 29  | 1 | Missing              | Suburban |
| 2010-2011 | M13 | 4  | P53 | M | 154 | 1 | Missing              | Suburban |
| 2010-2011 | M14 | 5  | P54 | F | 125 | 1 | Malnutrition         | Suburban |
| 2010-2011 | M14 | 5  | P55 | F | 145 | 1 | Malnutrition         | Suburban |
| 2010-2011 | M14 | 5  | P56 | F | 159 | 1 | Road accident        | Suburban |
| 2010-2011 | M14 | 5  | P57 | F | 161 | 1 | Missing              | Suburban |
| 2010-2011 | M14 | 5  | P58 | M | 45  | 1 | Being taken by human | Suburban |
| 2010-2011 | M15 | 13 | P59 | F | 95  | 1 | Missing              | Urban    |
| 2010-2011 | M15 | 13 | P60 | F | 95  | 1 | Missing              | Urban    |
| 2010-2011 | M15 | 13 | P61 | F | 95  | 1 | Missing              | Urban    |
| 2010-2011 | M15 | 13 | P62 | F | 95  | 1 | Missing              | Urban    |
| 2010-2011 | M15 | 13 | P63 | F | 175 | 1 | Missing              | Urban    |
| 2010-2011 | M15 | 13 | P64 | F | 175 | 1 | Missing              | Urban    |
| 2010-2011 | M15 | 13 | P65 | F | 175 | 1 | Missing              | Urban    |
| 2010-2011 | M15 | 13 | P66 | M | 149 | 1 | Disease              | Urban    |

|           |     |    |     |   |     |   |                      |       |
|-----------|-----|----|-----|---|-----|---|----------------------|-------|
| 2010-2011 | M15 | 13 | P67 | M | 149 | 1 | Disease              | Urban |
| 2010-2011 | M15 | 13 | P68 | M | 149 | 1 | Being taken by human | Urban |
| 2010-2011 | M15 | 13 | P69 | M | 149 | 1 | Being taken by human | Urban |
| 2010-2011 | M15 | 13 | P70 | M | 149 | 1 | Being taken by human | Urban |
| 2010-2011 | M15 | 13 | P71 | M | 149 | 1 | Being taken by human | Urban |
| 2010-2011 | M16 | 3  | P72 | M | 86  | 1 | Being taken by human | Urban |
| 2010-2011 | M16 | 3  | P73 | M | 86  | 1 | Being taken by human | Urban |
| 2010-2011 | M16 | 3  | P74 | F | 141 | 1 | Missing              | Urban |
| 2010-2011 | M17 | 4  | P75 | F | 114 | 1 | Disease              | Urban |
| 2010-2011 | M17 | 4  | P76 | F | 211 | 0 |                      | Urban |
| 2010-2011 | M17 | 4  | P77 | F | 197 | 1 | Missing              | Urban |

|           |     |   |     |   |     |   |         |       |
|-----------|-----|---|-----|---|-----|---|---------|-------|
| 2010-2011 | M17 | 4 | P78 | M | 211 | 0 |         | Urban |
| 2010-2011 | M18 | 3 | P79 | M | 54  | 1 | Unknown | Urban |
| 2010-2011 | M18 | 3 | P80 | F | 173 | 1 | Missing | Urban |
| 2010-2011 | M18 | 3 | P81 | F | 211 | 0 |         | Urban |
| 2010-2011 | M19 | 4 | P82 | M | 65  | 1 | Missing | Urban |
| 2010-2011 | M19 | 4 | P83 | M | 161 | 1 | Missing | Urban |
| 2010-2011 | M19 | 4 | P84 | F | 211 | 0 |         | Urban |
| 2010-2011 | M19 | 4 | P85 | F | 211 | 0 |         | Urban |
| 2010-2011 | M20 | 4 | P86 | M | 80  | 1 | Missing | Urban |
| 2010-2011 | M20 | 4 | P87 | M | 127 | 1 | Missing | Urban |
| 2010-2011 | M20 | 4 | P88 | F | 127 | 1 | Unknown | Urban |
| 2010-2011 | M20 | 4 | P89 | M | 127 | 1 | Missing | Urban |
| 2010-2011 | M21 | 5 | P90 | M | 60  | 1 | Unknown | Urban |

|           |     |   |      |   |     |   |         |          |
|-----------|-----|---|------|---|-----|---|---------|----------|
| 2010-2011 | M21 | 5 | P91  | M | 211 | 0 |         | Urban    |
| 2010-2011 | M21 | 5 | P92  | M | 109 | 1 | Missing | Urban    |
| 2010-2011 | M21 | 5 | P93  | F | 73  | 1 | Missing | Urban    |
| 2010-2011 | M21 | 5 | P94  | F | 211 | 0 |         | Urban    |
| 2011-2012 | M22 | 3 | P95  | M | 188 | 1 | Missing | Suburban |
| 2011-2012 | M22 | 3 | P96  | M | 211 | 0 |         | Suburban |
| 2011-2012 | M22 | 3 | P97  | F | 211 | 0 |         | Suburban |
| 2011-2012 | M23 | 3 | P98  | M | 65  | 1 | Cold    | Suburban |
| 2011-2012 | M23 | 3 | P99  | F | 65  | 1 | Cold    | Suburban |
| 2011-2012 | M23 | 3 | P100 | F | 211 | 0 |         | Suburban |
| 2011-2012 | M24 | 5 | P101 | U | 43  | 1 | Missing | Suburban |
| 2011-2012 | M24 | 5 | P102 | U | 43  | 1 | Missing | Suburban |
| 2011-2012 | M24 | 5 | P103 | U | 43  | 1 | Missing | Suburban |
| 2011-2012 | M24 | 5 | P104 | U | 43  | 1 | Missing | Suburban |
| 2011-2012 | M24 | 5 | P105 | U | 43  | 1 | Missing | Suburban |

|           |     |   |      |   |     |   |                   |          |
|-----------|-----|---|------|---|-----|---|-------------------|----------|
| 2011-2012 | M25 | 7 | P106 | M | 82  | 1 | Stomach infection | Suburban |
| 2011-2012 | M25 | 7 | P107 | F | 141 | 1 | Road accident     | Suburban |
| 2011-2012 | M25 | 7 | P108 | F | 120 | 1 | Inter group fight | Suburban |
| 2011-2012 | M25 | 7 | P109 | F | 63  | 1 | Cold              | Suburban |
| 2011-2012 | M25 | 7 | P110 | F | 66  | 1 | Inter group fight | Suburban |
| 2011-2012 | M25 | 7 | P111 | F | 66  | 1 | Inter group fight | Suburban |
| 2011-2012 | M25 | 7 | P112 | F | 29  | 1 | Disease           | Suburban |
| 2011-2012 | M26 | 5 | P113 | M | 85  | 1 | Missing           | Suburban |
| 2011-2012 | M26 | 5 | P114 | F | 139 | 1 | Missing           | Suburban |

|           |     |   |      |   |     |   |                      |          |
|-----------|-----|---|------|---|-----|---|----------------------|----------|
| 2011-2012 | M26 | 5 | P115 | M | 173 | 1 | Missing              | Suburban |
| 2011-2012 | M26 | 5 | P116 | F | 119 | 1 | Inter group fight    | Suburban |
| 2011-2012 | M26 | 5 | P117 | F | 211 | 0 |                      | Suburban |
| 2011-2012 | M27 | 6 | P118 | M | 211 | 0 |                      | Suburban |
| 2011-2012 | M27 | 6 | P119 | U | 5   | 1 | Suffocation          | Suburban |
| 2011-2012 | M27 | 6 | P120 | U | 5   | 1 | Suffocation          | Suburban |
| 2011-2012 | M27 | 6 | P121 | U | 8   | 1 | Suffocation          | Suburban |
| 2011-2012 | M27 | 6 | P122 | U | 8   | 1 | Suffocation          | Suburban |
| 2011-2012 | M27 | 6 | P123 | U | 8   | 1 | Suffocation          | Suburban |
| 2011-2012 | M28 | 5 | P124 | F | 99  | 1 | Inter group fight    | Suburban |
| 2011-2012 | M28 | 5 | P125 | M | 75  | 1 | Worm infection       | Suburban |
| 2011-2012 | M28 | 5 | P126 | F | 96  | 1 | Disease              | Suburban |
| 2011-2012 | M28 | 5 | P127 | F | 168 | 1 | Disease              | Suburban |
| 2011-2012 | M28 | 5 | P128 | M | 105 | 1 | Beaten up by human   | Suburban |
| 2011-2012 | M29 | 3 | P129 | M | 2   | 1 | Suffocation          | Suburban |
| 2011-2012 | M29 | 3 | P130 | M | 41  | 1 | Being taken by human | Suburban |
| 2011-2012 | M29 | 3 | P131 | M | 41  | 1 | Being taken by human | Suburban |
| 2011-2012 | M30 | 4 | P132 | U | 19  | 1 | Missing              | Suburban |
| 2011-2012 | M30 | 4 | P133 | U | 20  | 1 | Missing              | Suburban |
| 2011-2012 | M30 | 4 | P134 | U | 20  | 1 | Missing              | Suburban |
| 2011-2012 | M30 | 4 | P135 | U | 20  | 1 | Missing              | Suburban |
| 2011-2012 | M31 | 3 | P136 | U | 15  | 1 | Unknown              | Suburban |
| 2011-2012 | M31 | 3 | P137 | F | 122 | 1 | Disease              | Suburban |
| 2011-2012 | M31 | 3 | P138 | F | 149 | 1 | Road accident        | Suburban |

|           |     |   |      |   |     |   |                      |          |
|-----------|-----|---|------|---|-----|---|----------------------|----------|
| 2011-2012 | M32 | 5 | P139 | M | 88  | 1 | Disease              | Suburban |
| 2011-2012 | M32 | 5 | P140 | M | 38  | 1 | Being taken by human | Suburban |
| 2011-2012 | M32 | 5 | P141 | F | 47  | 1 | Worm infection       | Suburban |
| 2011-2012 | M32 | 5 | P142 | F | 40  | 1 | Worm infection       | Suburban |
| 2011-2012 | M32 | 5 | P143 | F | 106 | 1 | Road accident        | Suburban |
| 2011-2012 | M33 | 2 | P144 | M | 28  | 1 | Being taken by human | Suburban |
| 2011-2012 | M33 | 2 | P145 | F | 211 | 0 |                      | Suburban |
| 2011-2012 | M34 | 4 | P146 | F | 59  | 1 | Disease              | Suburban |
| 2011-2012 | M34 | 4 | P147 | M | 59  | 1 | Disease              | Suburban |
| 2011-2012 | M34 | 4 | P148 | F | 59  | 1 | Disease              | Suburban |
| 2011-2012 | M34 | 4 | P149 | M | 56  | 1 | Road accident        | Suburban |
| 2011-2012 | M35 | 1 | P150 | U | 57  | 1 | Missing              | Suburban |
| 2011-2012 | M36 | 6 | P151 | M | 56  | 1 | Being taken by human | Suburban |
| 2011-2012 | M36 | 6 | P152 | M | 52  | 1 | Missing              | Suburban |
| 2011-2012 | M36 | 6 | P153 | F | 118 | 1 | Missing              | Suburban |
| 2011-2012 | M36 | 6 | P154 | F | 84  | 1 | Road accident        | Suburban |
| 2011-2012 | M36 | 6 | P155 | F | 211 | 0 |                      | Suburban |
| 2011-2012 | M36 | 6 | P156 | M | 86  | 1 | Poison               | Suburban |
| 2011-2012 | M37 | 3 | P157 | F | 57  | 1 | Missing              | Suburban |
| 2011-2012 | M37 | 3 | P158 | F | 89  | 1 | Disease              | Suburban |
| 2011-2012 | M37 | 3 | P159 | M | 34  | 1 | Missing              | Suburban |
| 2011-2012 | M38 | 2 | P160 | M | 86  | 1 | Being taken by human | Suburban |
| 2011-2012 | M38 | 2 | P161 | M | 29  | 1 | Missing              | Suburban |
| 2011-2012 | M39 | 4 | P162 | F | 62  | 1 | Inter group fight    | Suburban |



|           |     |   |      |   |     |   |                      |          |
|-----------|-----|---|------|---|-----|---|----------------------|----------|
| 2011-2012 | M39 | 4 | P163 | F | 82  | 1 | Natural              | Suburban |
| 2011-2012 | M39 | 4 | P164 | M | 4   | 1 | Suffocation          | Suburban |
| 2011-2012 | M39 | 4 | P165 | M | 3   | 1 | Suffocation          | Suburban |
| 2011-2012 | M40 | 4 | P166 | M | 71  | 1 | Missing              | Urban    |
| 2011-2012 | M40 | 4 | P167 | M | 211 | 0 |                      | Urban    |
| 2011-2012 | M40 | 4 | P168 | F | 136 | 1 | Road accident        | Urban    |
| 2011-2012 | M40 | 4 | P169 | M | 94  | 1 | Being taken by human | Urban    |
| 2011-2012 | M41 | 2 | P170 | M | 211 | 0 |                      | Urban    |
| 2011-2012 | M41 | 2 | P171 | M | 146 | 1 | Missing              | Urban    |
| 2011-2012 | M42 | 7 | P172 | F | 172 | 1 | Missing              | Urban    |
| 2011-2012 | M42 | 7 | P173 | F | 211 | 0 |                      | Urban    |
| 2011-2012 | M42 | 7 | P174 | F | 211 | 0 |                      | Urban    |
| 2011-2012 | M42 | 7 | P175 | M | 73  | 1 | Road accident        | Urban    |
| 2011-2012 | M42 | 7 | P176 | M | 68  | 1 | Being taken by human | Urban    |
| 2011-2012 | M42 | 7 | P177 | M | 211 | 0 |                      | Urban    |
| 2011-2012 | M42 | 7 | P178 | F | 68  | 1 | Road accident        | Urban    |
| 2011-2012 | M43 | 5 | P179 | F | 211 | 0 |                      | Urban    |
| 2011-2012 | M43 | 5 | P180 | F | 64  | 1 | Road accident        | Urban    |
| 2011-2012 | M43 | 5 | P181 | M | 211 | 0 |                      | Urban    |
| 2011-2012 | M43 | 5 | P182 | F | 70  | 1 | Unknown              | Urban    |
| 2011-2012 | M43 | 5 | P183 | M | 211 | 0 |                      | Urban    |
| 2011-2012 | M44 | 3 | P184 | F | 211 | 0 |                      | Urban    |
| 2011-2012 | M44 | 3 | P185 | M | 211 | 0 |                      | Urban    |
| 2011-2012 | M44 | 3 | P186 | M | 88  | 1 | Being taken by human | Urban    |

|           |     |   |      |   |     |   |                      |          |
|-----------|-----|---|------|---|-----|---|----------------------|----------|
| 2011-2012 | M45 | 1 | P187 | M | 211 | 0 |                      | Urban    |
| 2011-2012 | M46 | 6 | P188 | U | 16  | 1 | Disease              | Urban    |
| 2011-2012 | M46 | 6 | P189 | M | 211 | 0 |                      | Urban    |
| 2011-2012 | M46 | 6 | P190 | M | 114 | 1 | Unknown              | Urban    |
| 2011-2012 | M46 | 6 | P191 | F | 211 | 0 |                      | Urban    |
| 2011-2012 | M46 | 6 | P192 | F | 211 | 0 |                      | Urban    |
| 2011-2012 | M46 | 6 | P193 | M | 46  | 1 | Being taken by human | Urban    |
| 2011-2012 | M47 | 3 | P194 | M | 211 | 0 |                      | Urban    |
| 2011-2012 | M47 | 3 | P195 | F | 68  | 1 | Road accident        | Urban    |
| 2011-2012 | M47 | 3 | P196 | F | 211 | 0 |                      | Urban    |
| 2011-2012 | M48 | 4 | P197 | M | 211 | 0 |                      | Urban    |
| 2011-2012 | M48 | 4 | P198 | M | 69  | 1 | Being taken by human | Urban    |
| 2011-2012 | M48 | 4 | P199 | M | 211 | 0 |                      | Urban    |
| 2011-2012 | M48 | 4 | P200 | M | 127 | 1 | Missing              | Urban    |
| 2012-2013 | M49 | 6 | P201 | M | 58  | 1 | Inter group fight    | Suburban |
| 2012-2013 | M49 | 6 | P202 | M | 58  | 1 | Inter group fight    | Suburban |
| 2012-2013 | M49 | 6 | P203 | M | 62  | 1 | Inter group fight    | Suburban |
| 2012-2013 | M49 | 6 | P204 | F | 58  | 1 | Inter group fight    | Suburban |
| 2012-2013 | M49 | 6 | P205 | F | 42  | 1 | Inter group fight    | Suburban |
| 2012-2013 | M49 | 6 | P206 | F | 211 | 0 |                      | Suburban |
| 2012-2013 | M50 | 3 | P207 | U | 4   | 1 | Missing              | Suburban |
| 2012-2013 | M50 | 3 | P208 | U | 4   | 1 | Missing              | Suburban |
| 2012-2013 | M50 | 3 | P209 | U | 4   | 1 | Missing              | Suburban |
| 2012-2013 | M51 | 6 | P210 | M | 51  | 1 | Being taken by human | Suburban |

|           |     |   |      |   |     |   |                      |          |
|-----------|-----|---|------|---|-----|---|----------------------|----------|
| 2012-2013 | M51 | 6 | P211 | M | 92  | 1 | Missing              | Suburban |
| 2012-2013 | M51 | 6 | P212 | F | 52  | 1 | Road accident        | Suburban |
| 2012-2013 | M51 | 6 | P213 | F | 89  | 1 | Missing              | Suburban |
| 2012-2013 | M51 | 6 | P214 | F | 51  | 1 | Being taken by human | Suburban |
| 2012-2013 | M51 | 6 | P215 | F | 111 | 1 | Inter group fight    | Suburban |
| 2012-2013 | M52 | 2 | P216 | F | 86  | 1 | Disease              | Suburban |
| 2012-2013 | M52 | 2 | P217 | F | 50  | 1 | Disease              | Suburban |

|           |     |   |      |   |     |   |                   |          |
|-----------|-----|---|------|---|-----|---|-------------------|----------|
| 2012-2013 | M53 | 2 | P218 | M | 3   | 1 | Inter group fight | Suburban |
| 2012-2013 | M53 | 2 | P219 | M | 197 | 1 | Road accident     | Suburban |
| 2012-2013 | M54 | 1 | P220 | U | 1   | 1 | At birth          | Suburban |
| 2012-2013 | M55 | 4 | P221 | U | 9   | 1 | Missing           | Suburban |
| 2012-2013 | M55 | 4 | P222 | U | 9   | 1 | Missing           | Suburban |
| 2012-2013 | M55 | 4 | P223 | U | 9   | 1 | Missing           | Suburban |
| 2012-2013 | M55 | 4 | P224 | U | 9   | 1 | Missing           | Suburban |
| 2012-2013 | M56 | 6 | P225 | U | 17  | 1 | Missing           | Suburban |
| 2012-2013 | M56 | 6 | P226 | U | 17  | 1 | Missing           | Suburban |
| 2012-2013 | M56 | 6 | P227 | U | 17  | 1 | Missing           | Suburban |
| 2012-2013 | M56 | 6 | P228 | F | 17  | 1 | Missing           | Suburban |
| 2012-2013 | M56 | 6 | P229 | F | 140 | 1 | Road accident     | Suburban |
| 2012-2013 | M56 | 6 | P230 | F | 136 | 1 | Stomach infection | Suburban |
| 2012-2013 | M57 | 5 | P231 | M | 120 | 1 | Road accident     | Suburban |
| 2012-2013 | M57 | 5 | P232 | M | 211 | 0 |                   | Suburban |
| 2012-2013 | M57 | 5 | P233 | F | 176 | 1 | Road accident     | Suburban |
| 2012-2013 | M57 | 5 | P234 | F | 211 | 0 |                   | Suburban |

|           |     |   |      |   |     |   |                      |          |
|-----------|-----|---|------|---|-----|---|----------------------|----------|
| 2012-2013 | M57 | 5 | P235 | F | 211 | 0 |                      | Suburban |
| 2012-2013 | M58 | 3 | P236 | M | 31  | 1 | Missing              | Suburban |
| 2012-2013 | M58 | 3 | P237 | M | 31  | 1 | Missing              | Suburban |
| 2012-2013 | M58 | 3 | P238 | M | 31  | 1 | Missing              | Suburban |
| 2012-2013 | M59 | 4 | P239 | M | 52  | 1 | Being taken by human | Suburban |
| 2012-2013 | M59 | 4 | P240 | M | 52  | 1 | Being taken by human | Suburban |
| 2012-2013 | M59 | 4 | P241 | F | 211 | 0 |                      | Suburban |
| 2012-2013 | M59 | 4 | P242 | F | 59  | 1 | Stomach infection    | Suburban |
| 2012-2013 | M60 | 4 | P243 | M | 65  | 1 | Disease              | Suburban |
| 2012-2013 | M60 | 4 | P244 | F | 62  | 1 | Disease              | Suburban |
| 2012-2013 | M60 | 4 | P245 | F | 58  | 1 | Disease              | Suburban |
| 2012-2013 | M60 | 4 | P246 | F | 211 | 0 |                      | Suburban |
| 2012-2013 | M61 | 4 | P247 | M | 42  | 1 | Being taken by human | Suburban |
| 2012-2013 | M61 | 4 | P248 | F | 42  | 1 | Being taken by human | Suburban |
| 2012-2013 | M61 | 4 | P249 | F | 42  | 1 | Being taken by human | Suburban |
| 2012-2013 | M61 | 4 | P250 | F | 211 | 0 |                      | Suburban |
| 2012-2013 | M62 | 3 | P251 | M | 46  | 1 | Disease              | Suburban |
| 2012-2013 | M62 | 3 | P252 | F | 46  | 1 | Disease              | Suburban |
| 2012-2013 | M62 | 3 | P253 | F | 57  | 1 | Disease              | Suburban |
| 2012-2013 | M63 | 3 | P254 | M | 17  | 1 | Disease              | Suburban |
| 2012-2013 | M63 | 3 | P255 | U | 17  | 1 | Disease              | Suburban |
| 2012-2013 | M63 | 3 | P256 | F | 84  | 1 | Disease              | Suburban |
| 2012-2013 | M64 | 3 | P257 | M | 23  | 1 | Being taken by human | Suburban |
| 2012-2013 | M64 | 3 | P258 | F | 132 | 1 | Missing              | Suburban |

|           |     |   |      |   |     |   |                      |          |
|-----------|-----|---|------|---|-----|---|----------------------|----------|
| 2012-2013 | M64 | 3 | P259 | F | 118 | 1 | Missing              | Suburban |
| 2012-2013 | M65 | 2 | P260 | M | 18  | 1 | Unknown              | Urban    |
| 2012-2013 | M65 | 2 | P261 | F | 211 | 0 |                      | Urban    |
| 2012-2013 | M66 | 7 | P262 | M | 19  | 1 | Disease              | Urban    |
| 2012-2013 | M66 | 7 | P263 | M | 19  | 1 | Disease              | Urban    |
| 2012-2013 | M66 | 7 | P264 | M | 19  | 1 | Disease              | Urban    |
| 2012-2013 | M66 | 7 | P265 | M | 19  | 1 | Disease              | Urban    |
| 2012-2013 | M66 | 7 | P266 | F | 19  | 1 | Disease              | Urban    |
| 2012-2013 | M66 | 7 | P267 | F | 211 | 0 |                      | Urban    |
| 2012-2013 | M66 | 7 | P268 | F | 211 | 0 |                      | Urban    |
| 2012-2013 | M67 | 6 | P269 | M | 58  | 1 | Being taken by human | Urban    |
| 2012-2013 | M67 | 6 | P270 | M | 20  | 1 | Unknown              | Urban    |
| 2012-2013 | M67 | 6 | P271 | M | 211 | 0 |                      | Urban    |
| 2012-2013 | M67 | 6 | P272 | F | 34  | 1 | Unknown              | Urban    |
| 2012-2013 | M67 | 6 | P273 | F | 51  | 1 | Road accident        | Urban    |

|           |     |   |      |   |     |   |                      |       |
|-----------|-----|---|------|---|-----|---|----------------------|-------|
| 2012-2013 | M67 | 6 | P274 | F | 211 | 0 |                      | Urban |
| 2012-2013 | M68 | 2 | P275 | F | 63  | 1 | Road accident        | Urban |
| 2012-2013 | M68 | 2 | P276 | F | 211 | 0 |                      | Urban |
| 2012-2013 | M69 | 5 | P277 | M | 17  | 1 | Disease              | Urban |
| 2012-2013 | M69 | 5 | P278 | M | 35  | 1 | Being taken by human | Urban |
| 2012-2013 | M69 | 5 | P279 | M | 211 | 0 |                      | Urban |
| 2012-2013 | M69 | 5 | P280 | M | 17  | 1 | Disease              | Urban |
| 2012-2013 | M69 | 5 | P281 | F | 17  | 1 | Disease              | Urban |
| 2012-2013 | M70 | 3 | P282 | M | 59  | 1 | Road accident        | Urban |

|           |     |   |      |   |     |   |                      |       |
|-----------|-----|---|------|---|-----|---|----------------------|-------|
| 2012-2013 | M70 | 3 | P283 | M | 50  | 1 | Being taken by human | Urban |
| 2012-2013 | M70 | 3 | P284 | F | 211 | 0 |                      | Urban |
| 2012-2013 | M71 | 1 | P285 | M | 211 | 0 |                      | Urban |
| 2012-2013 | M72 | 3 | P286 | M | 211 | 0 |                      | Urban |
| 2012-2013 | M72 | 3 | P287 | F | 59  | 1 | Unknown              | Urban |
| 2012-2013 | M72 | 3 | P288 | F | 211 | 0 |                      | Urban |
| 2012-2013 | M73 | 5 | P289 | M | 9   | 1 | Inter group fight    | Urban |
| 2012-2013 | M73 | 5 | P290 | M | 9   | 1 | Inter group fight    | Urban |
| 2012-2013 | M73 | 5 | P291 | M | 211 | 0 |                      | Urban |
| 2012-2013 | M73 | 5 | P292 | M | 19  | 1 | Disease              | Urban |
| 2012-2013 | M73 | 5 | P293 | F | 211 | 0 |                      | Urban |
| 2012-2013 | M74 | 3 | P294 | M | 25  | 1 | Missing              | Urban |
| 2012-2013 | M74 | 3 | P295 | F | 25  | 1 | Missing              | Urban |
| 2012-2013 | M74 | 3 | P296 | F | 211 | 0 |                      | Urban |
| 2012-2013 | M75 | 5 | P297 | M | 74  | 1 | Being taken by human | Urban |
| 2012-2013 | M75 | 5 | P298 | M | 88  | 1 | Being taken by human | Urban |
| 2012-2013 | M75 | 5 | P299 | M | 211 | 0 |                      | Urban |
| 2012-2013 | M75 | 5 | P300 | F | 211 | 0 |                      | Urban |
| 2012-2013 | M75 | 5 | P301 | F | 81  | 1 | Road accident        | Urban |
| 2013-2014 | M76 | 4 | P302 | M | 48  | 1 | Unknown              | Urban |
| 2013-2014 | M76 | 4 | P303 | M | 64  | 1 | Missing              | Urban |
| 2013-2014 | M76 | 4 | P304 | M | 211 | 0 |                      | Urban |
| 2013-2014 | M76 | 4 | P305 | F | 75  | 1 | Missing              | Urban |
| 2013-2014 | M77 | 3 | P306 | U | 23  | 1 | Disease              | Urban |

|           |     |   |      |   |     |   |                      |       |
|-----------|-----|---|------|---|-----|---|----------------------|-------|
| 2013-2014 | M77 | 3 | P307 | U | 23  | 1 | Disease              | Urban |
| 2013-2014 | M77 | 3 | P308 | U | 23  | 1 | Disease              | Urban |
| 2013-2014 | M78 | 5 | P309 | M | 46  | 1 | Being taken by human | Urban |
| 2013-2014 | M78 | 5 | P310 | M | 63  | 1 | Missing              | Urban |
| 2013-2014 | M78 | 5 | P311 | F | 211 | 0 |                      | Urban |
| 2013-2014 | M78 | 5 | P312 | F | 77  | 1 | Road accident        | Urban |
| 2013-2014 | M78 | 5 | P313 | F | 211 | 0 |                      | Urban |
| 2013-2014 | M79 | 2 | P314 | M | 56  | 1 | Missing              | Urban |
| 2013-2014 | M79 | 2 | P315 | M | 93  | 1 | Unknown              | Urban |
| 2013-2014 | M80 | 3 | P316 | M | 75  | 1 | Unknown              | Urban |
| 2013-2014 | M80 | 3 | P317 | F | 211 | 0 |                      | Urban |
| 2013-2014 | M80 | 3 | P318 | F | 65  | 1 | Road accident        | Urban |
| 2013-2014 | M81 | 2 | P319 | U | 6   | 1 | Natural              | Urban |
| 2013-2014 | M81 | 2 | P320 | U | 6   | 1 | Natural              | Urban |
| 2013-2014 | M82 | 4 | P321 | M | 8   | 1 | Disease              | Urban |
| 2013-2014 | M82 | 4 | P322 | M | 48  | 1 | Being taken by human | Urban |
| 2013-2014 | M82 | 4 | P323 | M | 211 | 0 |                      | Urban |
| 2013-2014 | M82 | 4 | P324 | F | 41  | 1 | Inter group fight    | Urban |
| 2013-2014 | M83 | 3 | P325 | M | 40  | 1 | Missing              | Urban |
| 2013-2014 | M83 | 3 | P326 | F | 75  | 1 | Unknown              | Urban |
| 2013-2014 | M83 | 3 | P327 | F | 211 | 0 |                      | Urban |
| 2013-2014 | M84 | 2 | P328 | M | 40  | 1 | Disease              | Urban |
| 2013-2014 | M84 | 2 | P329 | M | 40  | 1 | Disease              | Urban |
| 2013-2014 | M85 | 3 | P330 | M | 21  | 1 | Unknown              | Urban |

|           |     |   |      |   |     |   |                      |          |
|-----------|-----|---|------|---|-----|---|----------------------|----------|
| 2013-2014 | M85 | 3 | P331 | M | 211 | 0 |                      | Urban    |
| 2013-2014 | M85 | 3 | P332 | F | 59  | 1 | Road accident        | Urban    |
| 2013-2014 | M86 | 4 | P333 | M | 69  | 1 | Being taken by human | Urban    |
| 2013-2014 | M86 | 4 | P334 | M | 72  | 1 | Being taken by human | Urban    |
| 2013-2014 | M86 | 4 | P335 | F | 58  | 1 | Road accident        | Urban    |
| 2013-2014 | M86 | 4 | P336 | U | 5   | 1 | Unknown              | Urban    |
| 2013-2014 | M87 | 2 | P337 | F | 211 | 0 |                      | Urban    |
| 2013-2014 | M87 | 2 | P338 | F | 211 | 0 |                      | Urban    |
| 2014-2015 | M88 | 5 | P339 | M | 95  | 1 | Disease              | Suburban |
| 2014-2015 | M88 | 5 | P340 | M | 85  | 1 | Being taken by human | Suburban |
| 2014-2015 | M88 | 5 | P341 | M | 109 | 1 | Natural              | Suburban |
| 2014-2015 | M88 | 5 | P342 | F | 88  | 1 | Inter group fight    | Suburban |
| 2014-2015 | M88 | 5 | P343 | M | 103 | 1 | Inter group fight    | Suburban |
| 2014-2015 | M89 | 4 | P344 | M | 79  | 1 | Being taken by human | Suburban |
| 2014-2015 | M89 | 4 | P345 | F | 93  | 1 | Missing              | Suburban |
| 2014-2015 | M89 | 4 | P346 | F | 76  | 1 | Road accident        | Suburban |
| 2014-2015 | M89 | 4 | P347 | F | 89  | 1 | Missing              | Suburban |
| 2014-2015 | M90 | 2 | P348 | M | 81  | 1 | Inter group fight    | Suburban |
| 2014-2015 | M90 | 2 | P349 | F | 103 | 1 | Disease              | Suburban |
| 2014-2015 | M91 | 2 | P350 | M | 1   | 1 | At birth             | Suburban |
| 2014-2015 | M91 | 2 | P351 | U | 1   | 1 | At birth             | Suburban |
| 2014-2015 | M92 | 2 | P352 | F | 83  | 1 | Missing              | Suburban |
| 2014-2015 | M92 | 2 | P353 | F | 102 | 1 | Poison               | Suburban |
| 2014-2015 | M93 | 4 | P354 | M | 89  | 1 | Road accident        | Suburban |



|           |     |   |      |   |     |   |                      |          |
|-----------|-----|---|------|---|-----|---|----------------------|----------|
| 2014-2015 | M93 | 4 | P355 | F | 35  | 1 | Road accident        | Suburban |
| 2014-2015 | M93 | 4 | P356 | F | 35  | 1 | Road accident        | Suburban |
| 2014-2015 | M93 | 4 | P357 | F | 55  | 1 | Worm infection       | Suburban |
| 2014-2015 | M94 | 5 | P358 | M | 46  | 1 | Being taken by human | Suburban |
| 2014-2015 | M94 | 5 | P359 | M | 61  | 1 | Being taken by human | Suburban |
| 2014-2015 | M94 | 5 | P360 | F | 54  | 1 | Missing              | Suburban |
| 2014-2015 | M94 | 5 | P361 | F | 54  | 1 | Missing              | Suburban |
| 2014-2015 | M94 | 5 | P362 | F | 47  | 1 | Worm infection       | Suburban |
| 2014-2015 | M95 | 2 | P363 | M | 52  | 1 | Being taken by human | Suburban |
| 2014-2015 | M95 | 2 | P364 | M | 211 | 0 |                      | Suburban |

\*Survived till 7 month of pup age- 0, Died before 7 month of pup age- 1
